# Supplementary material
Source: MDPI journal article supplement (https://www.mdpi.com/2079-9292/12/15/3226)
Supplement: s1 [file s1]

# **Ecoflex flexible array of triboelectric nanogenerators for gait monitoring alarm warning applications**

**Qinglan Zheng<sup>1</sup>, Changjun Jia<sup>1</sup>, Fengxin Sun<sup>1</sup>, Mengqi Zhang<sup>1</sup>, Yuzhang Wen<sup>1</sup>, Zhenning Xie<sup>1</sup>, Junxiao Wang<sup>2</sup>, Bing Liu<sup>3,\*</sup>, Yupeng Mao<sup>1,2,\*</sup> and Chongle Zhao<sup>1,\*</sup>**

<sup>1</sup> Physical Education Department, Northeastern University, Shenyang 110819, China;  
2271515@stu.neu.edu.cn (Q.Z.); 2071367@stu.neu.edu.cn (C.J.);  
2171435@stu.neu.edu.cn (F.S.); 2201367@stu.neu.edu.cn (M.Z.);  
2201361@stu.neu.edu.cn (Y.W.); 2201362@stu.neu.edu.cn (Z.X.);  
m15753191782@163.com (J.W.)

<sup>2</sup> School of Strength and Conditioning Training, Beijing Sport University, Beijing 100084, China

<sup>3</sup> Shenyang Sport University, Shenyang 110102, China

\* Correspondence: bingliu067@163.com (B.L.); maoyupeng@pe.neu.edu.cn (Y.M.);  
zhaochongle@pe.neu.edu.cn (C.Z.)

**Table S1.** Comparison between FWF -TENG response and fast response of other TENG;

**Figure S1.** Measurement equipment;

**Figure S2.** Optical picture of the FWF-TENG array form located in the insole;

**Figure S3.** Demonstrates the full form of the WPIS;

**Figure S4.** Optical picture of FWF-TENG's wireless transmission system.

**Video S1.** Demonstration of the gas support structure of the FWF-TENG;

**Video S2.** FWF-TENG lights LEDs;

**Video S3.** LEDs on each part of the foot are accurately lit by the sensor;

**Video S4.** Badminton gait wireless judgment;

**Video S5.** Real-time fall alarm.

**Table S1.** Comparison between FWF -TENG response and fast response of other TENG.

| Article name                                                                                                                                                                                                                         | Material                                                                                                                                                                                                                     | Mchanism               | Fast response time |
|--------------------------------------------------------------------------------------------------------------------------------------------------------------------------------------------------------------------------------------|------------------------------------------------------------------------------------------------------------------------------------------------------------------------------------------------------------------------------|------------------------|--------------------|
| Detection of driving actions on steering wheel using triboelectric nanogenerator via machine learning                                                                                                                                | Kapton, Aluminum, buffer layer                                                                                                                                                                                               | Vertical detached mode | 608ms              |
| Nano-fiber based self-powered flexible vibration sensor for rail fasteners tightness safety detectionNano-fiber based self-powered flexible vibration sensor for rail fasteners tightness safety detection Nanohybrid Ammonia Sensor | PVDF/BTO nanofibers as negative triboelectric layer, silicone rubber as positive triboelectric layer, and aluminum (Al) electrode. Polyvinyl alcohol/silver (PVA/Ag) nanofibers and ethylene propylene fluoride (FEP) films. | Vertical detached mode | 40ms               |
| Strong and flame-retardant wood-based triboelectric nanogenerators toward self-powered building fire protection                                                                                                                      | Strong and flame-retardant wood is dielectric, and negative friction charge is generated on PTFE film, while positive friction charge is generated on wood film.                                                             | Vertical detached mode | 50ms               |
| High-performance flexible self-powered tin disulfide nanoflowers/reduced graphene oxide nanohybrid-based humidity sensor driven by triboelectric nanogenerator                                                                       | SSR, Copper foil, metal wire                                                                                                                                                                                                 | Single electrode       | 50ms               |
| A smart triboelectric nanogenerator with tunable rheological and electrical performance for self-powered multi-sensors                                                                                                               | Ecoflex, Cu, enamelled wire                                                                                                                                                                                                  | Single electrode       | 43ms               |
|                                                                                                                                                                                                                                      |                                                                                                                                                                                                                              |                        | 28ms               |

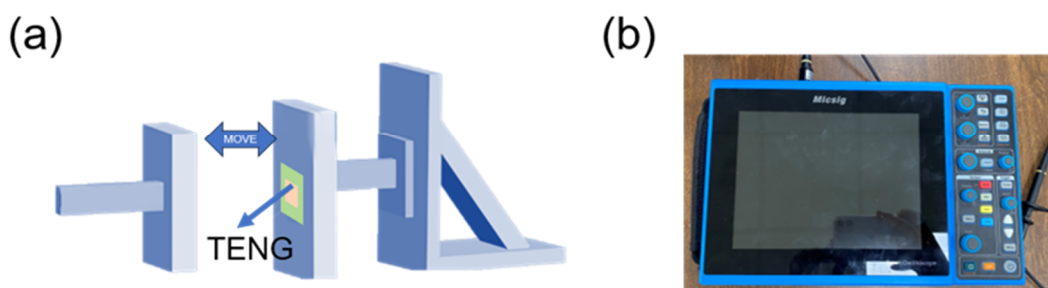

**Figure S1.** Measurement equipment. (a) The working diagram of FWF-TENG simulated by a stepper motor. (b) Oscilloscope.

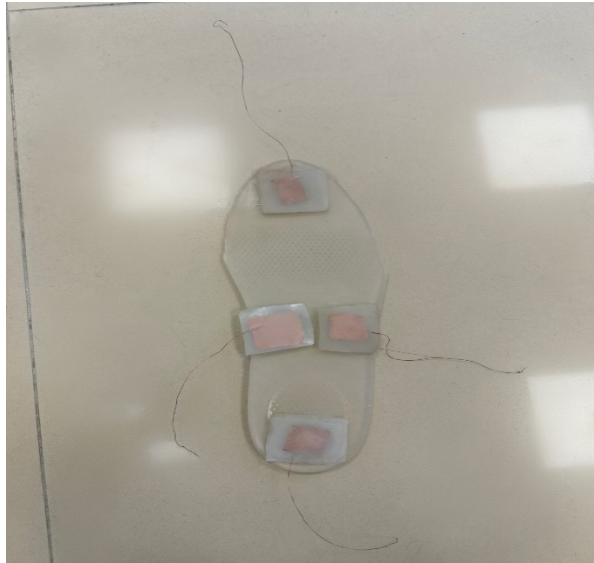

**Figure S2.** Optical picture of the FWF-TENG array form located in the insole.

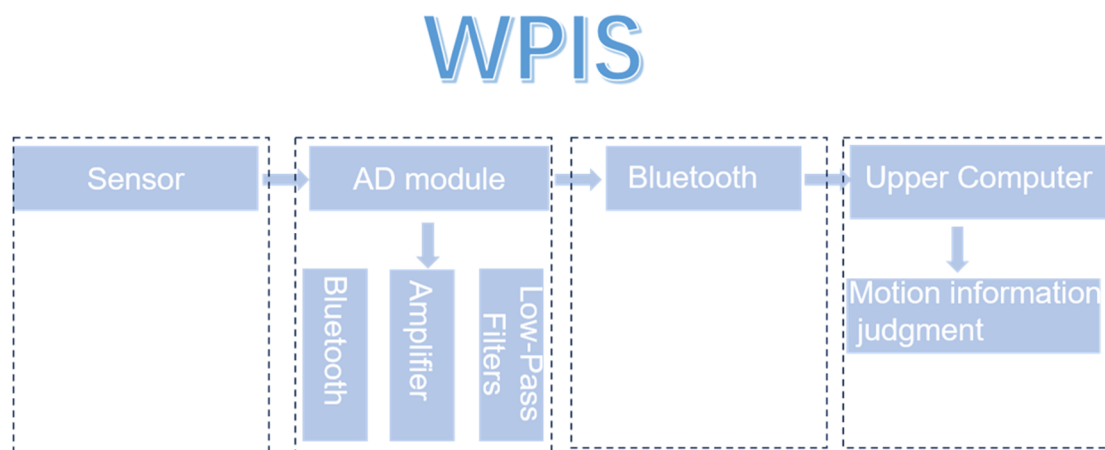

**Figure S3.** Demonstrates the full form of the WPIS.

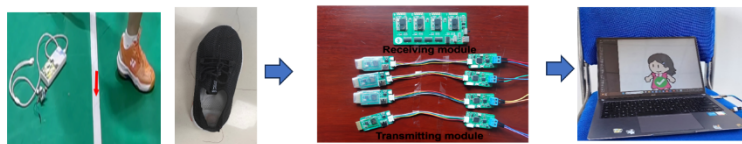

**Figure S4.** Optical picture of FWF-TENG's wireless transmission system.
